# Supplementary material for: Why are S–F and S–O non-covalent interactions stabilising?
Source: Royal Society of Chemistry journal article supplement (doi:10.1039/c8tc04252g), 2018-01-01
Supplement: c8tc04252g1.pdf [file c8tc04252g1.pdf]

# Supporting Information for

## Why are S-F and S-O non-covalent interactions stabilising?

Karl J. Thorley\* and Iain McCulloch

Imperial College London

Email: k.thorley@imperial.ac.uk

### Table of Contents

|                                             |     |
|---------------------------------------------|-----|
| Full FI-SAPT analysis of bithiophenes ..... | S2  |
| Natural bond orbital (NBO) analysis .....   | S4  |
| Electronic structure of substituents .....  | S4  |
| Electrostatic interactions .....            | S7  |
| Intermolecular model .....                  | S8  |
| Commercially available polymers .....       | S10 |

## Full FI-SAPT analysis of bithiophenes

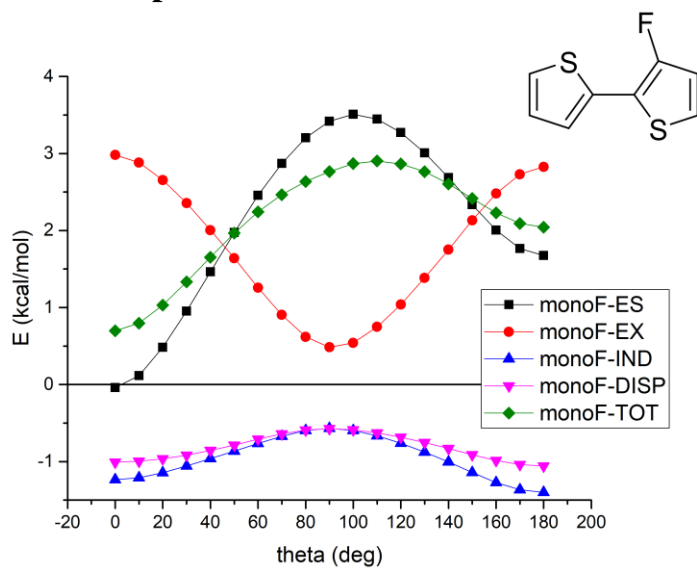

Figure S 1 FI-SAPT0/jun-cc-pVDZ analysis of monofluorobithiophene

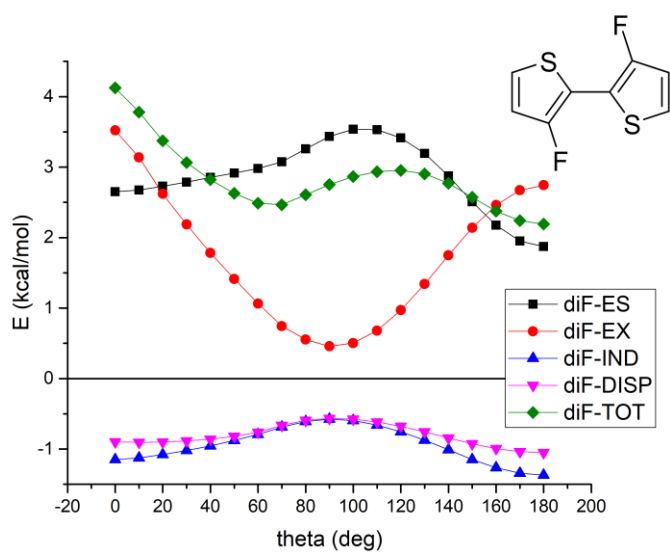

Figure S 2 FI-SAPT0/jun-cc-pVDZ analysis of difluorobithiophene

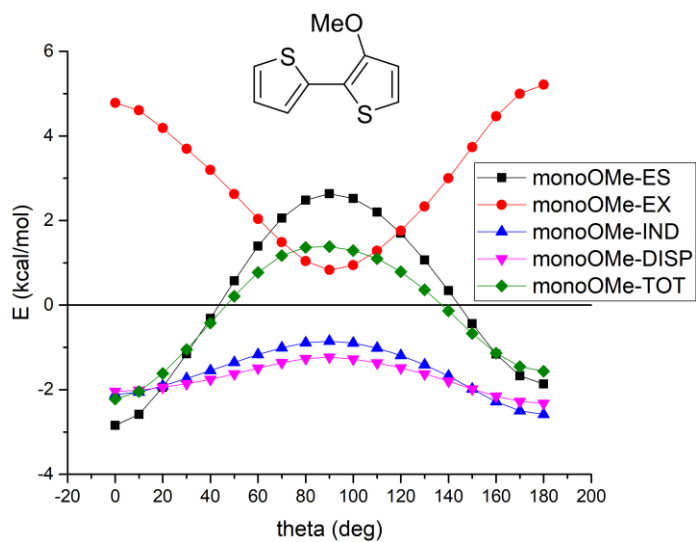

**Figure S 3** FI-SAPT0/jun-cc-pVDZ analysis of monomethoxybithiophene

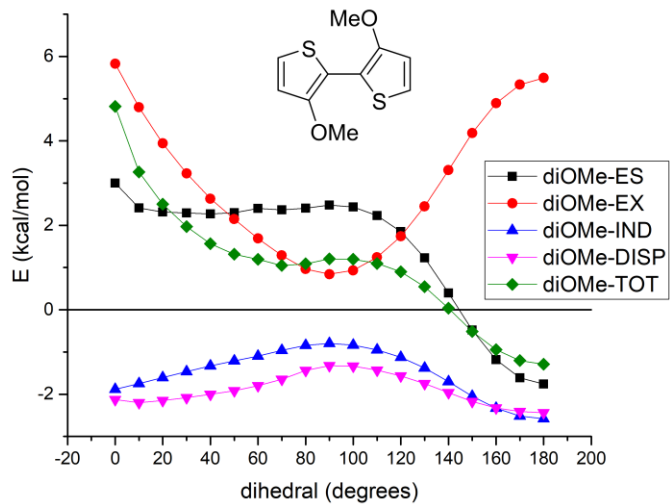

**Figure S 4** FI-SAPT0/jun-cc-pVDZ analysis of dimethoxybithiophene

## Natural bond orbital (NBO) analysis

NBO analysis was run using Gaussian 09 Rev D.01 interfaced to the NBO 6.0 program. Perturbation energy analysis was run with a cut-off of 0.1 kcal/mol in order to ensure intramolecular through-space interactions were reported. ‘Steric’, ‘dipole’, and ‘nce’ NBO keywords were used to obtain the relevant information.

### Electronic structure of substituents

Natural bond orbitals of bithiophene structures which are of importance for this study are shown below. Atomic dipoles are largely dependent on one of these lone pairs, and augmented by polarities of adjacent bonds. Hyperconjugation stabilization by donation of lone pair electron density into  $\sigma^*$  antibonding orbitals of the thiophene which the atom is directly bonded is observed for all lone pairs. Further, lone pair 1 of oxygen and lone pair 2 of fluorine donate electron density into the C-S  $\sigma^*$  bond (pictured) of the other thiophene ring, to form a through space charge transfer stabilization. This is primarily due to overlap between the two orbitals, and so continues to rise with decreasing atomic distance. While this can be used to describe some of the stabilization, it needs to be taken into context with the simultaneously increasing steric exchange energy.

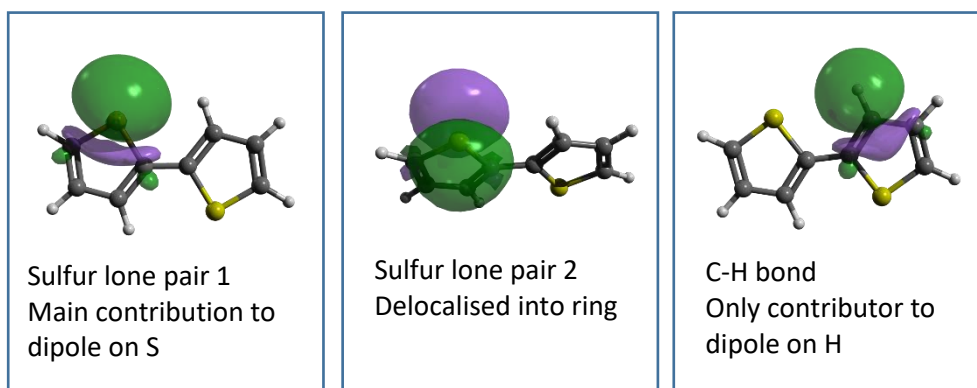

**Figure S 5.** Depiction of important NBO orbitals in bithiophene

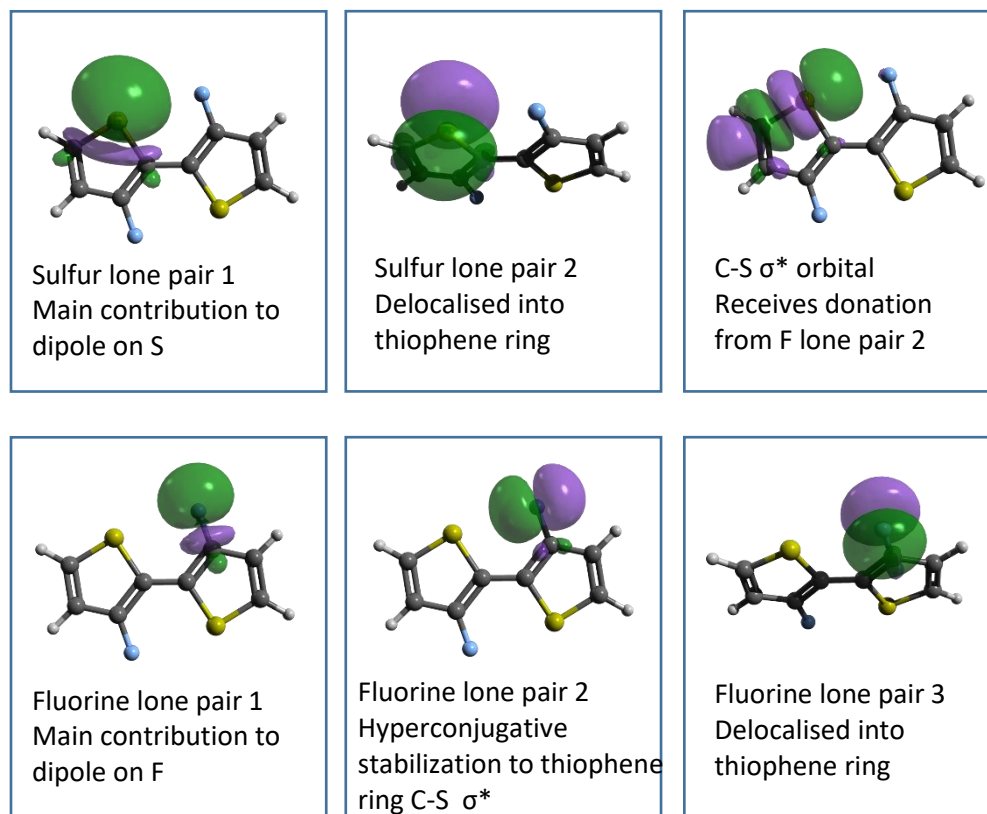

**Figure S 6** Depiction of important NBO orbitals in difluorobithiophene

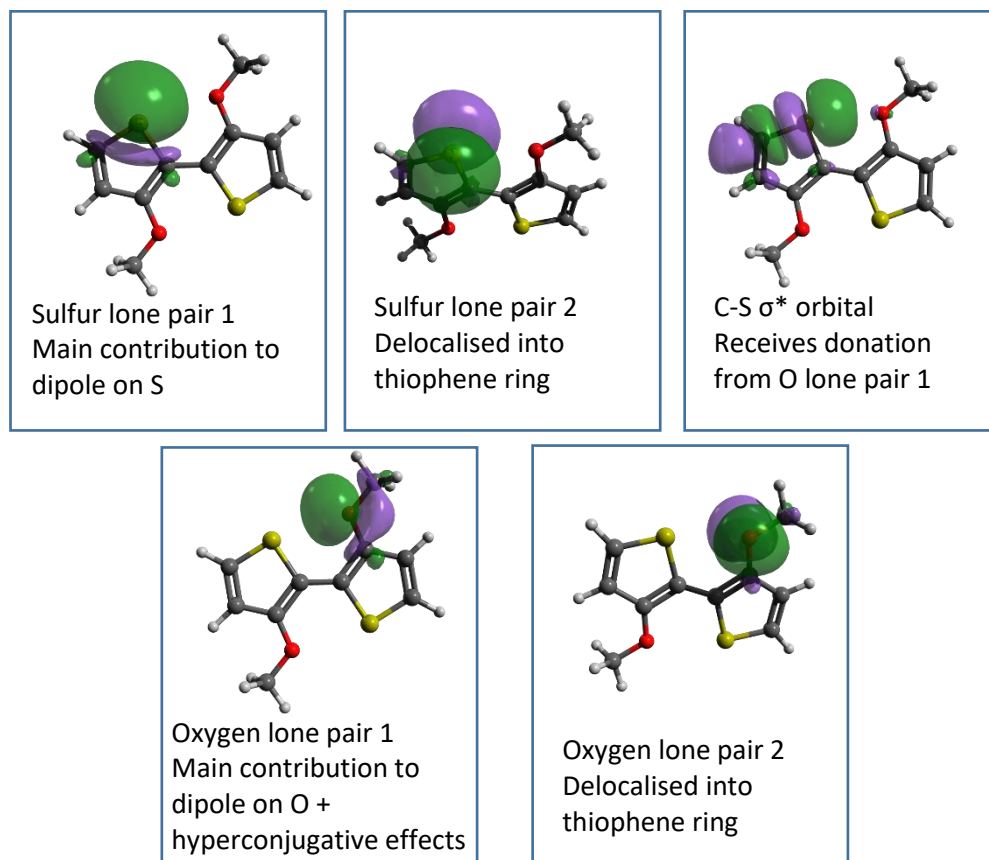

**Figure S 7.** Depiction of important NBO orbitals in dimethoxybithiophene

## Electrostatic interactions

Atomic charges were taken from the NBO natural coulomb electrostatics (NCE) analysis. Charge-charge potential energies were calculated using **Equation 1**:

$$V_{qq} = -\frac{1}{4\pi\epsilon_0} \frac{q_1 q_2}{R}$$

Where  $q_i$  is the charge on atom  $i$ , and  $R$  is the distance between atoms. Coulomb constant,  $1/4\pi\epsilon_0$ , is given as 332.0637 kcal Å / e mol. This gives the potential energy directly in kcal/mol using Angstrom and electronic charge units for  $R$  and  $q_i$ . All dipoles acting on a particular atom of interest were extracted from the NBO dipole analysis, using the natural localised molecular orbital (NLMO) derived vectors. This takes into account the delocalization effects of NBOs into one another. The vector sum of all dipoles acting on the atom was used as an overall atomic dipole, with the centre point assumed to be the atomic co-ordinate. For calculation, all dipole vectors are defined in a physical rather than chemical manner, i.e. the vector points in the direction from the negative pole to the positive pole, as reported by the NBO program.

Charge-dipole interactions were calculated using **equation 2**:

$$V_{qd} = -\frac{1}{4\pi\epsilon_0} \frac{q_1 \mu_2}{R^2} \cos\theta$$

Where  $q_i$  is the charge on atom  $i$ ,  $\mu_i$  is the strength of the dipole acting on atom  $i$ ,  $\theta$  is the angle between the vector connecting atomic centres and the summed atomic dipole vector. Dipole strength is converted from Debye to eÅ (1D = 0.20819434 eÅ) to give potentials in kcal/mol. Charge-dipole interactions were calculated in both directions (i.e.  $q_1$ - $d_2$  and  $q_2$ - $d_1$ ) taking care to reverse the atomic position vector to ensure the correct angle, and therefore correct sign, is obtained.

Finally, the dipole-dipole interaction is given by **equation 3**:

$$V_{dd} = \frac{1}{4\pi\epsilon_0} \frac{1}{|r|^3} \left[ \mu_1 \cdot \mu_2 - \frac{3(\mu_1 \cdot r)(\mu_2 \cdot r)}{|r|^2} \right]$$

Where  $\mu_i$  and  $r$  are the dipole and position vectors, which are processed by their dot product, and  $|r|$  is the distance between atoms. Equation 3 can be re-written with scalar only terms as **equation 4**:

$$V_{dd} = \frac{1}{4\pi\epsilon_0} \frac{\mu_1 \mu_2}{R^3} (\cos\theta_{12} - 3 \cos\theta_1 \cos\theta_2)$$

Where the terms are defined as in equation 2. The additional  $\theta_{12}$  term is defined as the angle between the two dipoles. All cosine terms were derived from the dot product of the two vectors:

$$\cos\theta = \frac{a \cdot b}{|a||b|}$$

## Intermolecular model

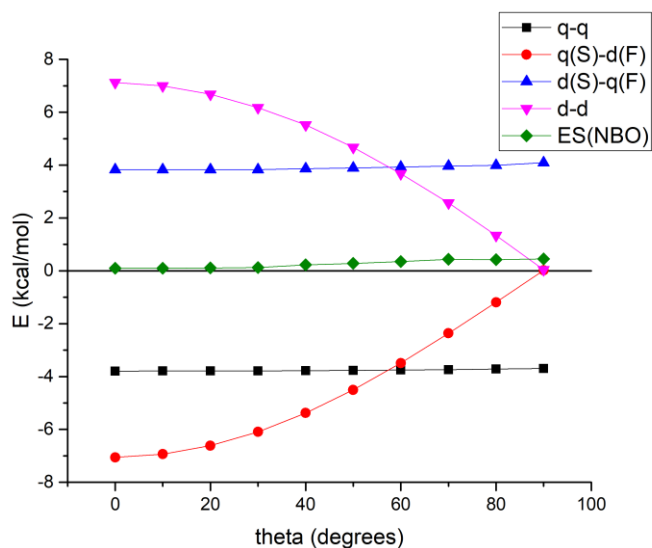

**Figure S 8.** NBO electrostatic analysis of intermolecular thiophene-fluoromethane interaction as a function of rotation of fluoromethane about its y-axis, where the fluorine atom is at the origin and S-F separation is 4 Å.

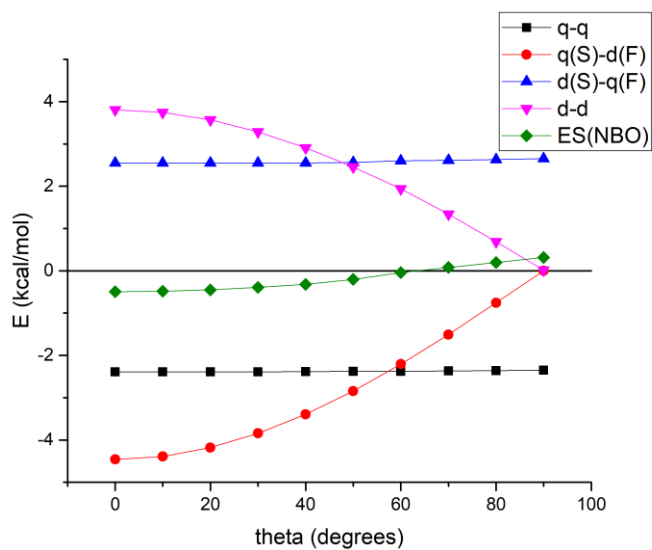

**Figure S 9.** NBO electrostatic analysis of intermolecular thiophene-fluoromethane interaction as a function of rotation of fluoromethane about its y-axis, where the fluorine atom is at the origin and S-F separation is 5 Å.



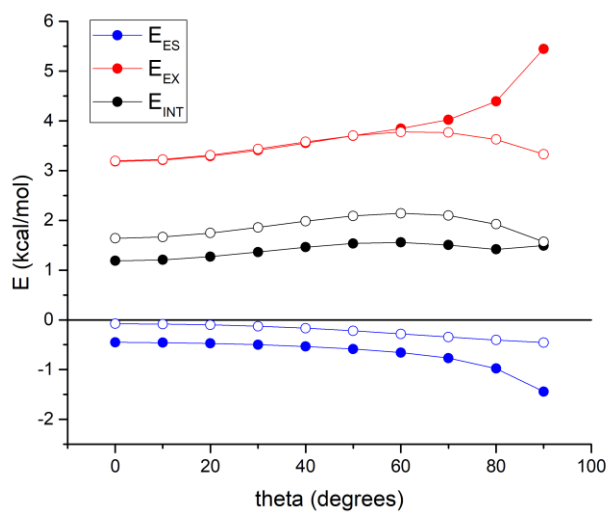

**Figure S 10.** SAPT0 (filled circles) and FI-SAPT (open circles) analysis of intermolecular thiophene-fluoromethane interaction as a function of rotation of fluoromethane about its z-axis, where the fluorine atom is at the origin.

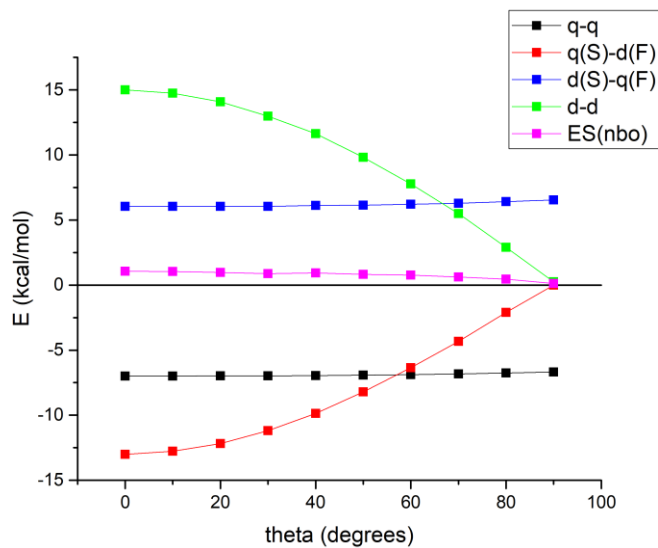

**Figure S 11.** NBO electrostatic analysis of intermolecular thiophene-fluoromethane interaction as a function of rotation of fluoromethane about its z-axis, where the fluorine atom is at the origin.

## Commercially available polymers

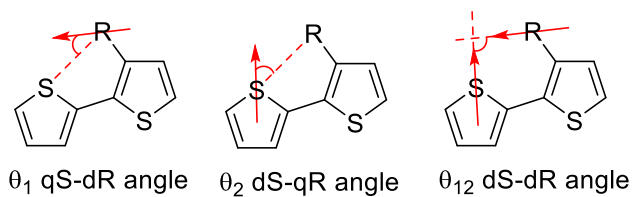

**Table S1.** Interatomic distances, charges (a.u.) and dipole angles (degrees) of planar fragments of commercially available polymers

| Structure         | S...R distance (Å) | Charge S | Charge R | $\theta_1$ | $\theta_2$ | $\theta_{12}$ |
|-------------------|--------------------|----------|----------|------------|------------|---------------|
| diOMe bithiophene | 2.86               | 0.44     | -0.65    | 14         | 93         | 73            |
| diF bithiophene   | 2.94               | 0.44     | -0.40    | 86         | 33         | 61            |
| PEDOT             | 2.94               | 0.44     | -0.64    | 27         | 99         | 58            |
| PCE10             | 2.84               | 0.41     | -0.37    | 70         | 69         | 41            |
| PCE11             | 2.72               | 0.45     | -0.39    | 80         | 36         | 64            |
| PCE12             | 2.76               | 0.53     | -0.66    | 63         | 69         | 48            |
| PDPP4T            | 2.94               | 0.49     | -0.73    | 83         | 58         | 39            |

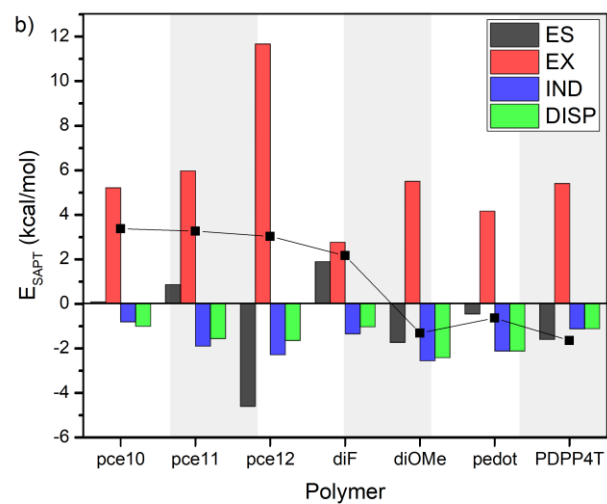

**Figure S 12.** FI-SAPT analysis of substructures of commercial polymers. Electrostatic energies may differ due to interacting fragmentation dipoles.

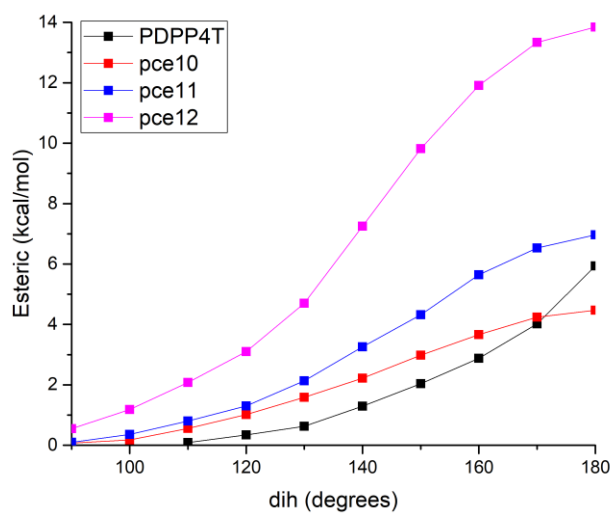

**Figure S 13.** NBO pairwise steric energies between S and O/F in commercial polymer fragments as function of dihedral angle.
